# Supplementary material
Source: HighWire-hosted journal article supplement (https://gpsych.bmj.com/content/36/3/e100997)
Supplement: inline-supplementary-material-1 [file inline-supplementary-material-1.pdf]

Supplementary Table: Pairwise bivariate correlational analysis between internet gaming disorder, sleep quality, suicidal behaviour, and stress (N=348).

|              | IGD (r)        | Suicidal behaviour (r) | Perceived Stress<br>(r) | PSQI (r) |
|--------------|----------------|------------------------|-------------------------|----------|
| GDHGS Score  | 1              |                        |                         |          |
| SBQ-R Score  | <b>0.319**</b> | 1                      |                         |          |
| PSS-10 Score | <b>0.719**</b> | <b>0.378**</b>         | 1                       |          |
| PSQI Score   | <b>0.613**</b> | <b>0.638**</b>         | <b>0.292**</b>          | 1        |

Pearson's Correlation coefficients (r). \*\* (p<0.001) Highly significant.
